# Supplementary material for: Association of Prognostic Understanding With Health Care Use Among Older Adults With Advanced Cancer: A Secondary Analysis of a Cluster Randomized Clinical Trial
Source: PubMed Central journal article supplement (PMC8857680; doi:10.1001/jamanetworkopen.2022.0018), 2022-02-18
Supplement: jamanetwopen-e220018-s001.pdf [file jamanetwopen-e220018-s001.pdf]

## Supplementary Online Content

Loh KP, Seplaki CL, Sanapala C, et al. Association of prognostic understanding with health care use among older adults with advanced cancer: a secondary analysis of a cluster randomized clinical trial. *JAMA Netw Open*. 2022;5(2):e220018.

doi:10.1001/jamanetworkopen.2022.0018

**eTable 1.** National Cancer Institute Community Oncology Research Program (NCORP) Community Affiliate Partners

**eTable 2.** Associations of Poor Prognostic Understanding, Prognostic Discordance, and Individual Covariates With Hospitalization at 6 Months

**eTable 3.** Associations of Poor Prognostic Understanding, Prognostic Discordance, and Individual Covariates With Hospice Use

**eTable 4.** Sensitivity Analyses Showing Bivariate and Multivariable Associations of Beliefs Regarding Cancer Curability and Life Expectancy Estimates With Hospitalization and Hospice Use

**eTable 5.** Sensitivity Analyses Showing Bivariate and Multivariable Associations of Prognostic Discordance Regarding Curability and Survival Estimates With Hospitalization and Hospice Use

This supplementary material has been provided by the authors to give readers additional information about their work.

**eTable 1.** National Cancer Institute Community Oncology Research Program (NCORP)  
Community Affiliate Partners

| <b>NCORP Community Affiliate</b>                                              |
|-------------------------------------------------------------------------------|
| Aurora NCORP (Illinois, Wisconsin)                                            |
| Columbus NCORP (Columbus, Ohio)                                               |
| Delaware/Christiana Care (Newark, Delaware)                                   |
| Geisinger Cancer Institute Oncology Research Program (Danville, Pennsylvania) |
| NCORP of the Carolinas (Greenville, South Carolina)                           |
| Hawaii Minority Underserved NCORP (Honolulu, Hawaii)                          |
| Heartland Cancer Research NCORP (Decatur, Illinois)                           |
| Metro-Minnesota NCORP (Saint Louis Park, Minnesota)                           |
| Michigan Cancer Research Consortium NCORP (Ann Arbor, Michigan)               |
| Nevada Cancer Research Foundation NCORP (Las Vegas, Nevada)                   |
| Northwell Health NCORP (Lake Success, New York)                               |
| Pacific Cancer Research Consortium NCORP (Seattle, Washington)                |
| Southeast Clinical Oncology Consortium NCORP (Winston- Salem, North Carolina) |
| Wisconsin NCORP (Marshfield, Wisconsin)                                       |
| Wichita NCORP (Wichita, Kansas)                                               |

**eTable 2.** Associations of Poor Prognostic Understanding, Prognostic Discordance, and Individual Covariates With Hospitalization at 6 Months

|                                                                 |                        | <b>No hospitalization<br/>(N=411)</b> | <b>Hospitalization<br/>(N=130)</b> | <b>P value</b> |
|-----------------------------------------------------------------|------------------------|---------------------------------------|------------------------------------|----------------|
| Age in years, mean (SD)                                         |                        | 76.6 (5.3)                            | 76.5 (5.1)                         | 0.95           |
| Gender <sup>a</sup>                                             | Male                   | 204 (49.8)                            | 72 (55.4)                          | 0.26           |
|                                                                 | Female                 | 206 (50.2)                            | 58 (44.6)                          |                |
| Race <sup>a</sup>                                               | Black                  | 34 (8.3)                              | 6 (4.6)                            | 0.10           |
|                                                                 | White                  | 368 (89.8)                            | 118 (90.8)                         |                |
|                                                                 | Other <sup>g</sup>     | 8 (2.0)                               | 6 (4.6)                            |                |
| Education <sup>a</sup>                                          | <High school           | 51 (12.4)                             | 15 (11.5)                          | 0.70           |
|                                                                 | High school graduate   | 144 (35.1)                            | 51 (39.2)                          |                |
|                                                                 | Some college or above  | 215 (52.4)                            | 64 (49.2)                          |                |
| Marital status <sup>a</sup>                                     | Married                | 267 (65.1)                            | 81 (62.3)                          | 0.56           |
|                                                                 | Other                  | 143 (34.9)                            | 49 (37.7)                          |                |
| Income <sup>b</sup>                                             | ≤\$50,000              | 194 (47.6)                            | 71 (54.6)                          | 0.34           |
|                                                                 | >\$50,000              | 127 (31.1)                            | 37 (28.5)                          |                |
|                                                                 | Decline to answer      | 87 (21.3)                             | 22 (16.9)                          |                |
| Cancer type <sup>a</sup>                                        | Breast                 | 57 (13.9)                             | 13 (10.1)                          | 0.41           |
|                                                                 | Gastrointestinal       | 91 (22.1)                             | 38 (27.1)                          |                |
|                                                                 | Genitourinary          | 55 (13.4)                             | 17 (13.2)                          |                |
|                                                                 | Lung                   | 100 (24.3)                            | 37 (28.7)                          |                |
|                                                                 | Other                  | 108 (26.3)                            | 27 (20.9)                          |                |
| Impaired geriatric assessment domain                            | Physical performance   | 386 (93.9)                            | 121 (93.1)                         | 0.73           |
|                                                                 | Functional status      | 235 (57.2)                            | 84 (64.6)                          | 0.13           |
|                                                                 | Comorbidity            | 251 (61.1)                            | 94 (72.3)                          | 0.02           |
|                                                                 | Nutrition              | 246 (59.9)                            | 80 (61.5)                          | 0.73           |
|                                                                 | Cognition              | 140 (35.2)                            | 40 (28.0)                          | 0.009          |
|                                                                 | Medical social support | 108 (26.5)                            | 47 (36.2)                          | 0.03           |
|                                                                 | Psychological status   | 97 (23.6)                             | 39 (30.0)                          | 0.14           |
|                                                                 | Polypharmacy           | 344 (83.7)                            | 109 (83.9)                         | 0.97           |
| Poor prognostic understanding regarding curability <sup>c</sup> |                        | 161 (63.1)                            | 45 (52.9)                          | 0.17           |
| Poor prognostic understanding                                   |                        | 163 (43.6)                            | 41 (34.4)                          | 0.07           |

|                                                                         |  |            |           |      |
|-------------------------------------------------------------------------|--|------------|-----------|------|
| regarding life expectancy estimates <sup>d</sup>                        |  |            |           |      |
| Prognostic discordance regarding curability <sup>e</sup>                |  | 144 (61.5) | 47 (56.0) | 0.37 |
| Prognostic discordance regarding life expectancy estimates <sup>f</sup> |  | 261 (70.5) | 95 (77.9) | 0.12 |

<sup>a</sup>Missing data in 1

<sup>b</sup>Missing data in 3

<sup>c</sup>Missing data in 193

<sup>d</sup>Missing data in 45

<sup>e</sup>Missing data in 205

<sup>f</sup>Missing data in 49

<sup>g</sup>7 patients were Asian, 4 patients were American Indian/Alaskan Native, 1 patient was Native Hawaiian or Other Pacific Islander, 2 patients had mixed races

**eTable 3.** Associations of Poor Prognostic Understanding, Prognostic Discordance, and Individual Covariates With Hospice Use

|                                      |                                                                 | <b>Not enrolled on hospice (N=459)</b> | <b>Enrolled on hospice (N=82)</b> | <b>P value</b> |       |
|--------------------------------------|-----------------------------------------------------------------|----------------------------------------|-----------------------------------|----------------|-------|
| Age in years, mean (SD)              |                                                                 | 76.6 (5.2)                             | 76.6 (5.6)                        | 0.02           |       |
| Gender <sup>a</sup>                  | Male                                                            | 232 (50.7)                             | 44 (53.7)                         | 0.62           |       |
|                                      | Female                                                          | 226 (49.3)                             | 38 (46.3)                         |                |       |
| Race <sup>a</sup>                    | Black                                                           | 38 (8.3)                               | 2 (2.4)                           | 0.17           |       |
|                                      | White                                                           | 408 (89.1)                             | 78 (95.1)                         |                |       |
|                                      | Other                                                           | 12 (2.6)                               | 2 (2.4)                           |                |       |
| Education <sup>a</sup>               | <High school                                                    | 51 (11.1)                              | 15 (18.3)                         | 0.09           |       |
|                                      | High school graduate                                            | 172 (37.6)                             | 23 (28.1)                         |                |       |
|                                      | Some college or above                                           | 235 (51.3)                             | 44 (54.7)                         |                |       |
| Marital status <sup>a</sup>          | Married                                                         | 300 (65.5)                             | 48 (58.5)                         | 0.22           |       |
|                                      | Other                                                           | 159 (34.5)                             | 34 (41.5)                         |                |       |
| Income <sup>b</sup>                  | ≤\$50,000                                                       | 225 (49.3)                             | 40 (48.8)                         | <0.01          |       |
|                                      | >\$50,000                                                       | 148 (32.5)                             | 16 (19.5)                         |                |       |
|                                      | Decline to answer                                               | 83 (18.2)                              | 26 (31.7)                         |                |       |
| Cancer type <sup>a</sup>             | Breast                                                          | 67 (14.6)                              | 3 (3.7)                           | <0.01          |       |
|                                      | Gastrointestinal                                                | 93 (20.3)                              | 33 (40.7)                         |                |       |
|                                      | Genitourinary                                                   | 70 (15.3)                              | 2 (2.5)                           |                |       |
|                                      | Lung                                                            | 111 (24.2)                             | 26 (32.1)                         |                |       |
|                                      | Other <sup>g</sup>                                              | 118 (25.7)                             | 17 (21.0)                         |                |       |
| Impaired geriatric assessment domain | Physical performance                                            | 430 (93.7)                             | 77 (93.9)                         | 0.94           |       |
|                                      | Functional status                                               | 252 (54.9)                             | 67 (81.7)                         | <0.01          |       |
|                                      | Comorbidity                                                     | 286 (62.3)                             | 59 (72.0)                         | 0.09           |       |
|                                      | Nutrition                                                       | 259 (56.4)                             | 67 (81.7)                         | <0.01          |       |
|                                      | Cognition                                                       | 153 (33.3)                             | 27 (32.9)                         | 0.94           |       |
|                                      | Instrumental social support                                     | 122 (26.6)                             | 34 (41.5)                         | <0.01          |       |
|                                      | Psychological status                                            | 105 (22.9)                             | 31 (37.8)                         | <0.01          |       |
|                                      | Polypharmacy                                                    | 388 (84.5)                             | 65 (79.3)                         | 0.23           |       |
|                                      | Poor prognostic understanding regarding curability <sup>c</sup> | Yes                                    | 178 (60.8)                        | 28 (50.9)      | 0.17  |
|                                      | Poor prognostic understanding regarding                         | Yes                                    | 192 (45.6)                        | 13 (17.3)      | <0.01 |

|                                                                         |     |            |           |      |
|-------------------------------------------------------------------------|-----|------------|-----------|------|
| life expectancy estimates <sup>d</sup>                                  |     |            |           |      |
| Prognostic discordance regarding curability <sup>e</sup>                | Yes | 172 (61.2) | 30 (54.6) | 0.36 |
| Prognostic discordance regarding life expectancy estimates <sup>f</sup> | Yes | 299 (71.7) | 57 (76.0) | 0.44 |

<sup>a</sup>Missing data in 1

<sup>b</sup>Missing data in 2

<sup>c</sup>Missing data in 193

<sup>d</sup>Missing data in 45

<sup>e</sup>Missing data in 205

<sup>f</sup>Missing data in 49

<sup>g</sup>7 patients were Asian, 4 patients were American Indian/Alaskan Native, 1 patient was Native Hawaiian or Other Pacific Islander, 2 patients had mixed races

**eTable 4.** Sensitivity Analyses Showing Bivariate and Multivariable Associations of Beliefs Regarding Cancer Curability and Life Expectancy Estimates With Hospitalization and Hospice Use

|                           |             | <b>Bivariate Analyses<sup>a</sup></b>       | <b>Multivariable Analyses<sup>b</sup></b>            |
|---------------------------|-------------|---------------------------------------------|------------------------------------------------------|
|                           |             | <b>Odds Ratio (95% Confidence Interval)</b> | <b>Adjusted Odds Ratio (95% Confidence Interval)</b> |
| <b>Hospitalization</b>    |             |                                             |                                                      |
| Beliefs about curability  | 0%          | Ref                                         | Ref                                                  |
|                           | <50%        | 0.81 (0.55-1.18)                            | 0.66 (0.36-1.20)                                     |
|                           | 50%         | 0.86 (0.41-1.77)                            | 0.84 (0.45-1.59)                                     |
|                           | >50%        | 0.47 (0.22-1.01)                            | 0.62 (0.21-1.22)                                     |
|                           | 100%        | 1.00 (0.37-2.71)                            | 1.01 (0.41-2.49)                                     |
| Life expectancy estimates | 0-6 months  | Ref                                         | Ref                                                  |
|                           | 7-12 months | 0.78 (0.18-3.29)                            | 0.69 (0.15-3.25)                                     |
|                           | 1-2 years   | 0.63 (0.16-2.54)                            | 0.73 (0.17-3.24)                                     |
|                           | 2-5 years   | 0.85 (0.19-3.79)                            | 1.18 (0.24-5.86)                                     |
|                           | >5 years    | 0.51 (0.14-1.82)                            | 0.72 (0.20-2.59)                                     |
| <b>Hospice Use</b>        |             |                                             |                                                      |
| Beliefs about curability  | 0%          | Ref                                         | Ref                                                  |
|                           | <50%        | 1.05 (0.55-1.98)                            | 1.18 (0.62-2.23)                                     |
|                           | 50%         | 0.54 (0.24-1.19)                            | 0.43 (0.17-1.09)                                     |
|                           | >50%        | 0.43 (0.21-0.89)                            | 0.69 (0.30-1.60)                                     |
|                           | 100%        | 0.71 (0.11-4.70)                            | 0.54 (0.06-4.72)                                     |
| Life expectancy estimates | 0-6 months  | Ref                                         | Ref                                                  |
|                           | 7-12 months | 1.83 (0.36-9.28)                            | 2.00 (0.45-8.81)                                     |
|                           | 1-2 years   | 0.66 (0.15-2.88)                            | 0.70 (0.18-2.64)                                     |
|                           | 2-5 years   | 0.30 (0.07-1.33)                            | 0.59 (0.16-2.20)                                     |
|                           | >5 years    | 0.14 (0.04-0.46)                            | 0.21 (0.07-0.66)                                     |

<sup>a</sup>Accounting for clustering at the practice level

<sup>b</sup>Adjusted for demographics, cancer type, study arm, and age-related conditions and accounting for clustering at the practice level

**eTable 5.** Sensitivity Analyses Showing Bivariate and Multivariable Associations of Prognostic Discordance Regarding Curability and Survival Estimates With Hospitalization and Hospice Use

|                                                                         | <b>Bivariate Analyses<sup>a</sup></b>       | <b>Multivariable Analyses<sup>b</sup></b>            |
|-------------------------------------------------------------------------|---------------------------------------------|------------------------------------------------------|
|                                                                         | <b>Odds Ratio (95% Confidence Interval)</b> | <b>Adjusted Odds Ratio (95% Confidence Interval)</b> |
| Hospitalization                                                         |                                             |                                                      |
| Prognostic discordance regarding curability <sup>c</sup>                | 0.74 (0.45-1.24)                            | 0.71 (0.44-1.14)                                     |
| Prognostic discordance regarding life expectancy estimates <sup>d</sup> | 1.67 (1.08-2.59)                            | 1.73 (1.03-2.93)                                     |
| Hospice Use                                                             |                                             |                                                      |
| Prognostic discordance regarding curability <sup>c</sup>                | 0.98 (0.63-1.53)                            | 0.89 (0.55-1.42)                                     |
| Prognostic discordance regarding life expectancy estimates <sup>d</sup> | 1.88 (1.24-2.85)                            | 1.46 (0.87-2.43)                                     |

<sup>a</sup>Accounting for clustering at the practice level

<sup>b</sup>Adjusted for demographics, cancer type, study arm, and age-related conditions and accounting for clustering at the practice level

<sup>c</sup>Beliefs about curability were collapsed in the following ways for both patients and oncologists: 0% vs. >0 to 100%. Prognostic discordance regarding curability was defined if there was any patient-oncologist difference in the response options

<sup>d</sup>Life expectancy estimates were collapsed in the following ways for both patients and oncologists: 0-12 months vs. 1-2 years vs. 2 to >5 years. Prognostic discordance regarding life expectancy estimates was defined if there was any patient-oncologist difference in the response options
