# Supplementary material for: Association of Prognostic Understanding With Health Care Use Among Older Adults With Advanced Cancer: A Secondary Analysis of a Cluster Randomized Clinical Trial
Source: PubMed Central journal article supplement (PMC8857680; doi:10.1001/jamanetworkopen.2022.0018), 2022-02-18
Supplement: jamanetwopen-e220018-s002.pdf [file jamanetwopen-e220018-s002.pdf]

## Data Sharing Statement

Loh. Association of Prognostic Understanding With Health Care Use Among Older Adults With Advanced Cancer. *JAMA Netw Open*. Published February 18, 2022.

doi:10.1001/jamanetworkopen.2022.0018

### Data

**Data available:** Yes

**Data types:** Other (please specify)

**Additional Information:** Available on request

**How to access data:** [kahpoh\\_loh@urmc.rochester.edu](mailto:kahpoh_loh@urmc.rochester.edu)

**When available:** With publication

### Supporting Documents

**Document types:** None

### Additional Information

**Who can access the data:** The trial protocol has been previously published in the parent study

**Types of analyses:** The trial protocol has been previously published in the parent study

**Mechanisms of data availability:** Already published
